# Supplementary material for: Effect of Zn2+ ions on the assembly of amylin oligomers: insight into the molecular mechanisms
Source: Royal Society of Chemistry journal article supplement (doi:10.1039/c6cp04105a), 2016-01-01
Supplement: c6cp04105a1.pdf [file c6cp04105a1.pdf]

**Supporting Information for**  
**“Effect of Zn<sup>2+</sup> ions on the assembly of amylin oligomers: Insight into the molecular mechanisms”**

Vered Wineman-Fisher,<sup>1,2</sup> and Yifat Miller<sup>1,2</sup>

*<sup>1</sup>Department of Chemistry, Ben-Gurion University of the Negev, P.O. Box 653, Be'er Sheva 84105, Israel*

*<sup>2</sup>Ilse Katz Institute for Nanoscale Science and Technology, Ben-Gurion University of the Negev, Beér-Sheva 84105, Israel*

**Corresponding Author:**

Yifat Miller

**E-mail:** [ymiller@bgu.ac.il](mailto:ymiller@bgu.ac.il)

**Fax:** +972-86428709

**Tel:** +972-86428705

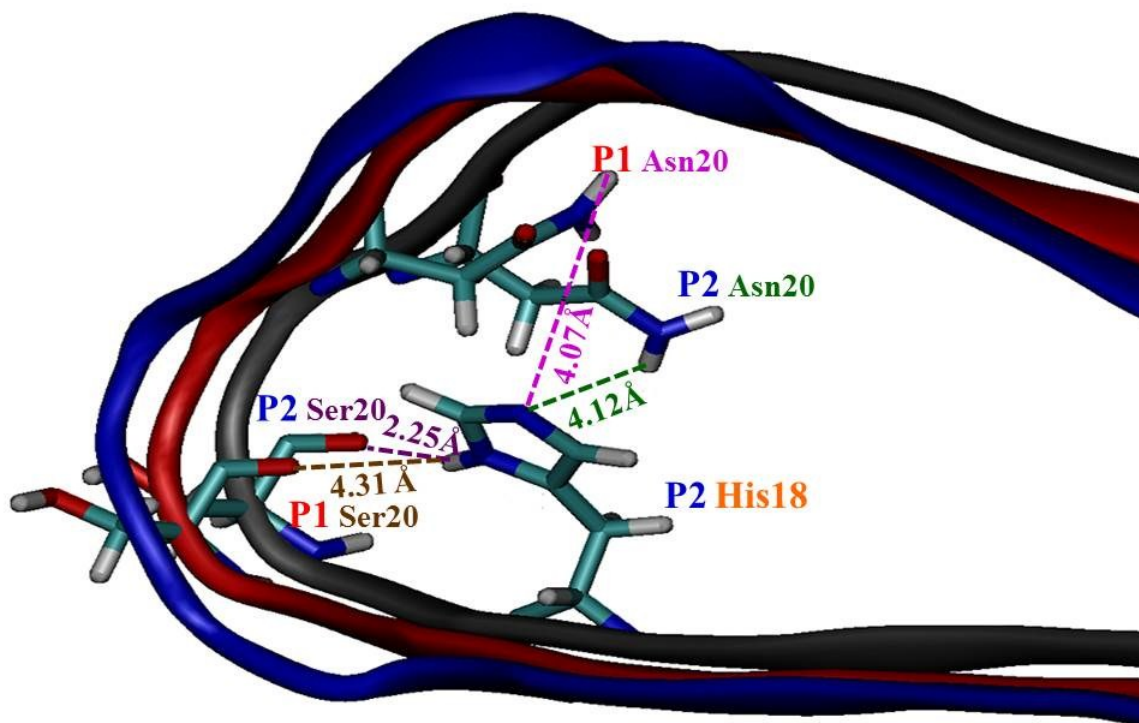

**Figure S1:** Illustration of the inside the core domain of model Q1 that is based on model A1. The core domain in which the His18 suppose to bind  $Zn^{2+}$  ion can not accommodate the  $Zn^{2+}$  ion, therefore in the minimization process the  $Zn^{2+}$  ions were escaped from the binding site core domain.

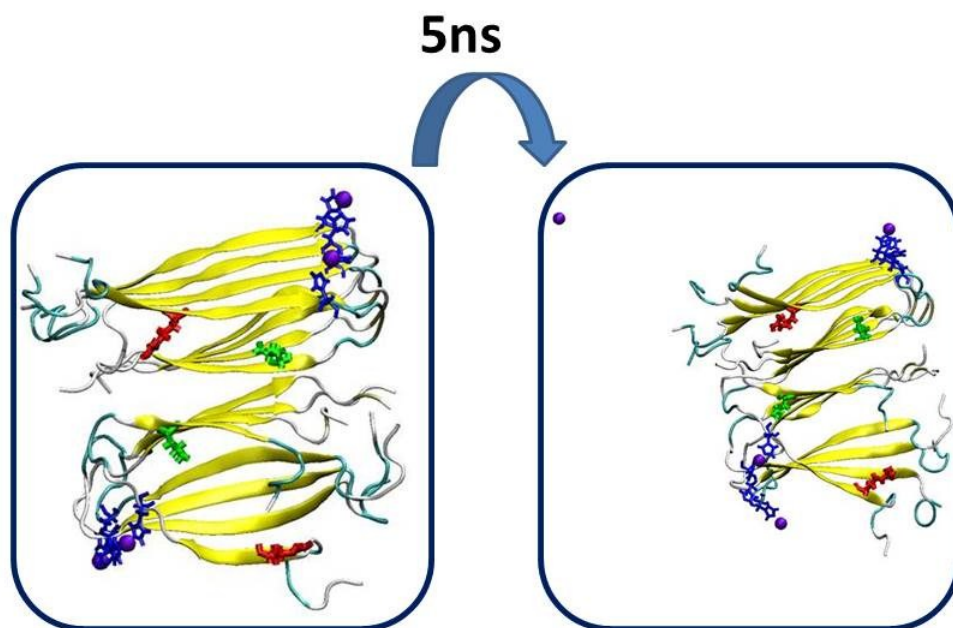

**Figure S2:** Simulations of model S2 illustrate that Zn<sup>2+</sup> ions were escaped from the binding site.

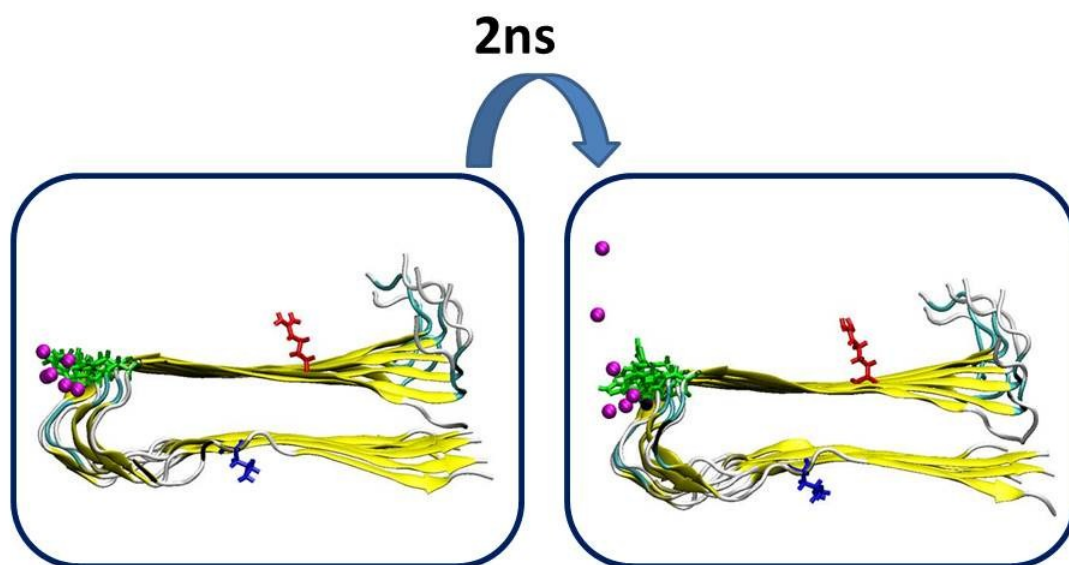

**Figure S3:** Simulations of model R1 with Zn<sup>2+</sup>:amylin ratio of 1:1 illustrate that after 2 ns the Zn<sup>2+</sup> ions were escaped from the binding site.

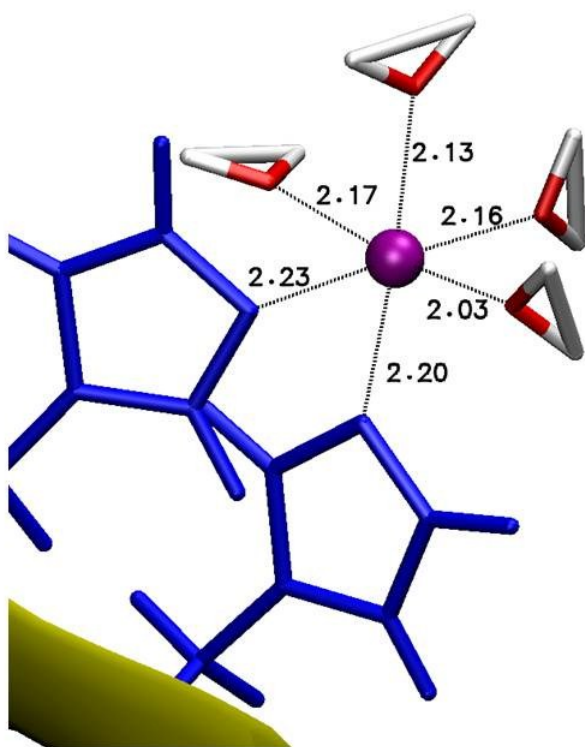

**Figure S4:** Illustration of one of the binding sites of Zn<sup>2+</sup> ions in model R1 with the Zn<sup>2+</sup>:amylin ratio of 1:2. Four water molecules complete the coordination with the Zn<sup>2+</sup> ion.

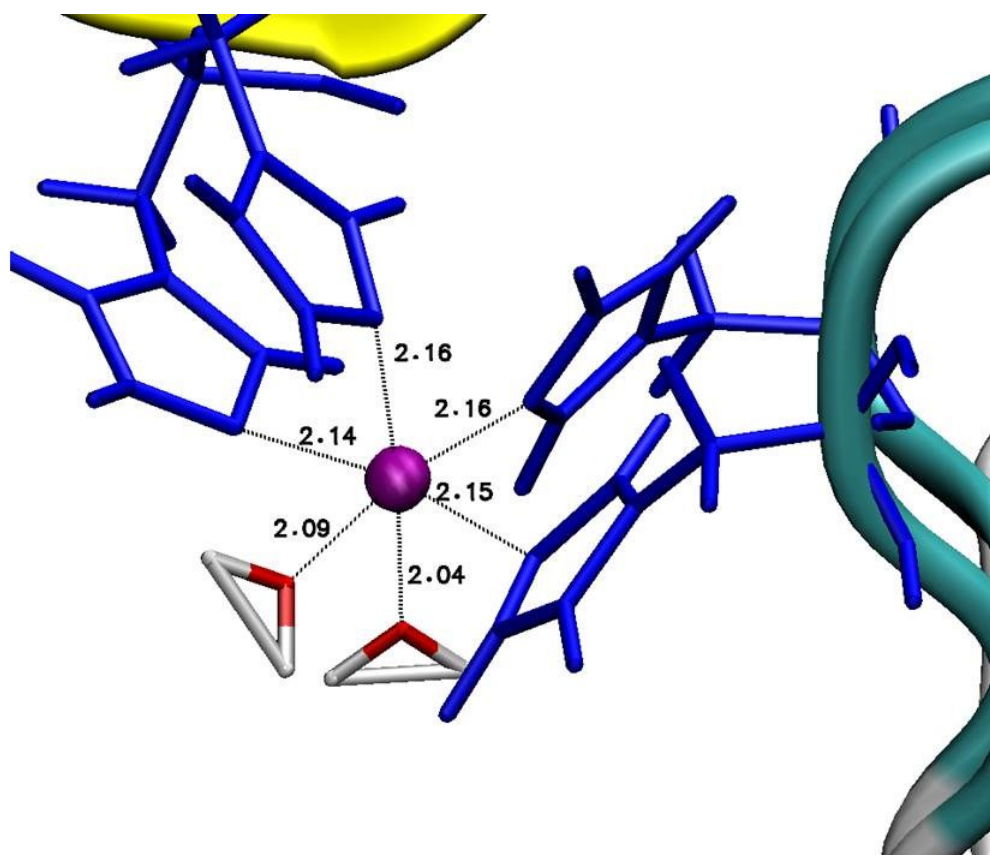

**Figure S5:** Illustration of one of the binding sites of Zn<sup>2+</sup> ions in model S3 with the Zn<sup>2+</sup>:amylin ratio of 1:4. Two water molecules complete the coordination with the Zn<sup>2+</sup> ion.

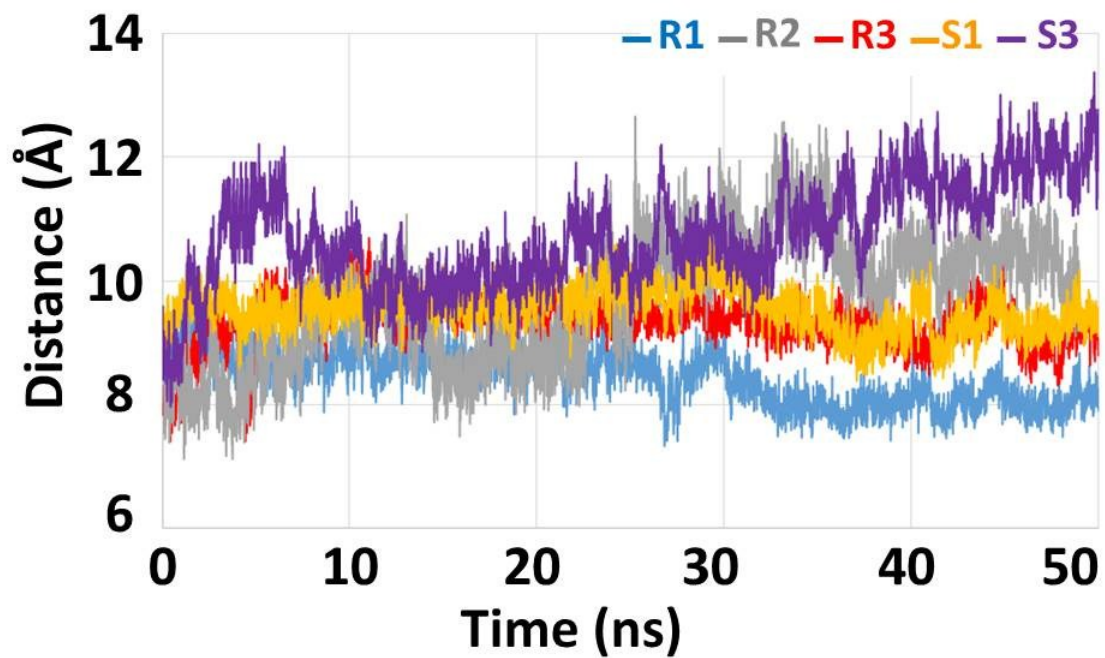

**Figure S6:** The averaged inter-sheet ( $C\alpha$  backbone-backbone) distances for simulated models of  $Zn^{2+}$ -amylin oligomers models R1, R2 and S1 and with  $Zn^{2+}$ :amylin ratio of 1:2, and models R3 and S3 with ratio of 1:4.

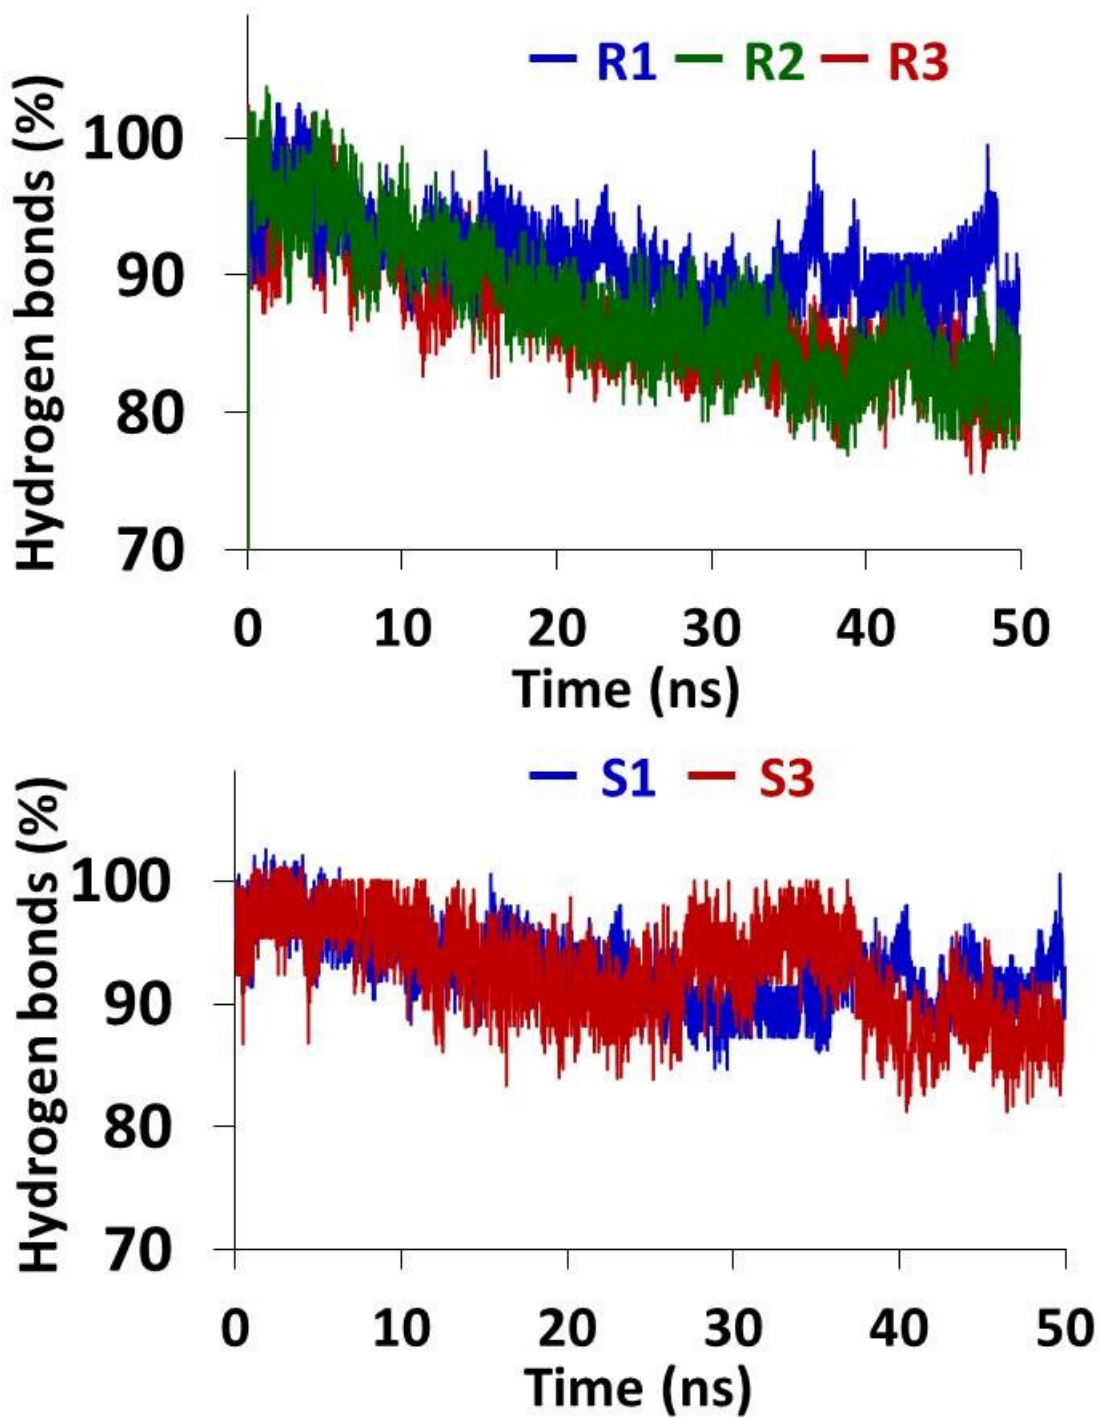

**Figure S7:** The fraction of the number of hydrogen bonds (in percentage) between all  $\beta$ -strands compare to the number in the initial constructed model, for models of  $\text{Zn}^{2+}$ -amylin oligomers models R1, R2 and S1 and with  $\text{Zn}^{2+}$ :amylin ratio of 1:2, and models R3 and S3 with ratio of 1:4.



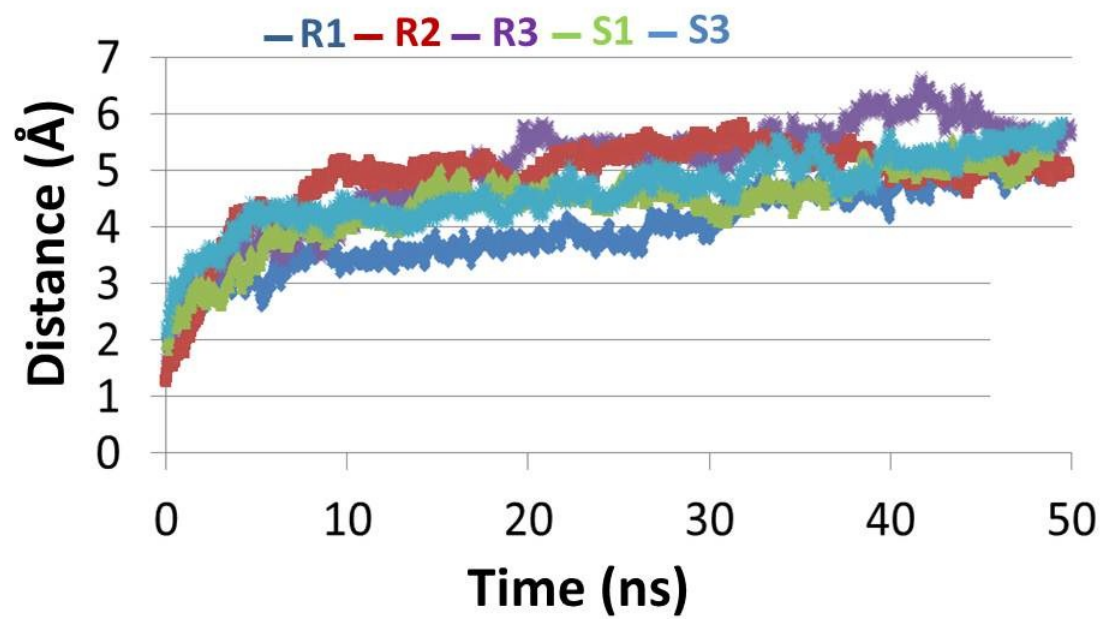

**Figure S8:** RMSDs of models of  $\text{Zn}^{2+}$ -amylin oligomers models R1, R2 and S1 and with  $\text{Zn}^{2+}$ :amylin ratio of 1:2, and models R3 and S3 with ratio of 1:4.

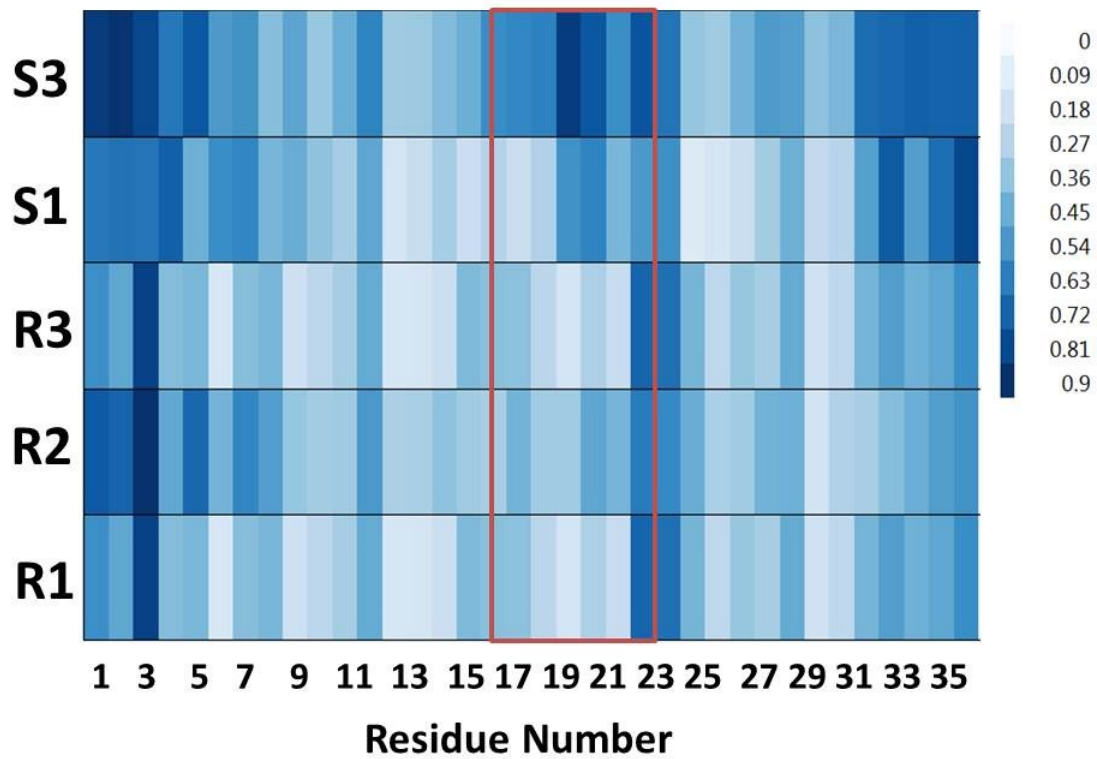

**Figure S9:** Average number of water molecules around each side-chain C $\beta$  carbon (within 4 Å) for Zn<sup>2+</sup>-amylin oligomers models R1, R2 and S1 and with Zn<sup>2+</sup>:amylin ratio of 1:2, and models R3 and S3 with ratio of 1:4.

**Table S1:** The angles (in degree) His-Zn<sup>2+</sup>-His, His-Zn<sup>2+</sup>-Water, Water-Zn<sup>2+</sup>-Water in the binding site of model R1 (Figure S4).

| HIS1   | HIS1    | HIS2  | Water1 | Water2 | Water3 | Water4  |
|--------|---------|-------|--------|--------|--------|---------|
| HIS1   | -----   | 88.14 | 84.58  | -----  | 91.52  | 103.984 |
| HIS2   | 88.14   | ----- | 91.80  | 93.71  | -----  | 88.77   |
| Water1 | 84.58   | 91.80 | -----  | 87.81  | 92.29  | -----   |
| Water2 | -----   | 93.71 | 87.813 | -----  | 87.08  | 83.75   |
| Water3 | 91.52   | ----- | 92.29  | 87.08  | -----  | 88.0    |
| Water4 | 103.984 | 88.77 | -----  | 83.75  | 88.0   | -----   |

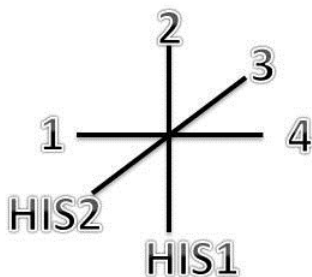

**Table S2:** The angles (in degree) His-Zn<sup>2+</sup>-His, His-Zn<sup>2+</sup>-Water, Water-Zn<sup>2+</sup>-Water in the binding site of model S3 (Figure S5).

| HIS1   | HIS1    | HIS2   | HIS3   | HIS4    | Water1 | Water2 |
|--------|---------|--------|--------|---------|--------|--------|
| HIS1   | -----   | 91.52  | 94.963 | 101.463 | -----  | 88.43  |
| HIS2   | 91.52   | -----  | 96.113 | -----   | 81.68  | 88.243 |
| HIS3   | 94.963  | 96.113 | -----  | 86.33   | 94.283 | -----  |
| HIS4   | 101.463 | -----  | 86.33  | -----   | 84.91  | 88.94  |
| Water1 | -----   | 81.68  | 94.28  | 84.91   | -----  | 82.85  |
| Water2 | 88.43   | 88.24  | -----  | 88.94   | 82.85  | -----  |

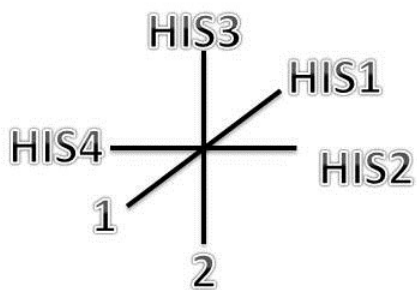

**Table S3:** The conformational energies (computed using the GBMV calculations) and the standard deviations.

| Model | Energy (kcal/mol) | Standard deviation (kcal/mol) |
|-------|-------------------|-------------------------------|
| M2    | -6908             | 147                           |
| M2d   | -6850             | 146                           |
| M5    | -6668             | 151                           |
| R1    | -9125             | 155                           |
| R2    | -9095             | 165                           |
| R3    | -7722             | 159                           |
| S1    | -8998             | 217                           |
| S3    | -7550             | 146                           |
